# Supplementary material for: Early life stress causes sex-specific changes in adult fronto-limbic connectivity that differentially drive learning
Source: eLife. 2020 Dec 1;9:e58301. doi: 10.7554/eLife.58301 (PMC7725504; doi:10.7554/eLife.58301)
Supplement: Figure 1—source data 1. [file elife-58301-fig1-data1.xlsx]

## Sheet: p14 weights 
Animal	Condition	Sex	P14 Weight (g)
P6.2.1	UPS	M	5.8
P6.2.2	UPS	F	4.4
P6.2.3	UPS	F	4.6
P6.2.4	UPS	F	6.1
P6.2.5	UPS	M	5.4
P6.2.6	UPS	F	3.5
P6.2.7	UPS	M	4.3
P1.1.1	CTL	F	7.7
P1.1.2	CTL	M	7.6
P1.1.3	CTL	F	7.7
P1.1.4	CTL	F	7.3
P1.1.5	CTL	M	8
P1.1.6	CTL	M	7.8
P2.1.1	UPS	F	7.5
P2.1.2	UPS	M	4.1
P2.1.3	UPS	F	7
P2.1.4	UPS	M	7
P2.1.5	UPS	F	7.2
P2.1.6	UPS	F	6.8
P2.1.7	UPS	F	2.9
P2.1.8	UPS	F	6.1
P2.3.1	UPS	M	6.7
P2.3.2	UPS	M	7.1
P2.3.3	UPS	M	7.2
P2.3.4	UPS	M	7.9
P2.3.5	UPS	M	7.3
P6.1.1	UPS	F	3.9
P6.1.2	UPS	M	5.2
P6.1.3	UPS	F	5
P6.1.4	UPS	F	5
P6.1.5	UPS	F	3.8
3.1.1	CTL	M	6
3.1.2	CTL	M	5.8
3.1.3	CTL	M	5.5
3.1.4	CTL	F	5
3.1.5	CTL	M	5.1
3.1.6	CTL	F	6
3.1.7	CTL	F	5.7
3.1.8	CTL	M	6.3
3.1.9	CTL	F	6
3.1.10	CTL	M	3.9
8.3.1	CTL	M	7.3
8.3.2	CTL	M	7.7
8.3.3	CTL	M	7.5
8.3.4	CTL	F	7.3
8.3.5	CTL	M	7
8.3.6	CTL	M	7.5
8.3.7	CTL	F	6.6
8.3.8	CTL	M	4.7
9.1.1	CTL	M	7
9.1.2	CTL	F	6.7
9.1.3	CTL	F	4.7
9.1.4	CTL	F	6.6
9.1.5	CTL	F	6.9
9.1.6	CTL	F	7.1
9.1.7	CTL	M	6.4
9.1.8	CTL	M	7
9.1.9	CTL	M	5
10.2.1	UPS	F	6.5
10.2.2	UPS	F	6.1
10.2.3	UPS	M	6.3
10.2.4	UPS	F	6.2
10.2.5	UPS	F	3.8
10.2.6	UPS	M	6.7
4.3.1	UPS	F	5.3
4.3.2	UPS	M	4.6
4.3.3	UPS	F	6.3
4.3.4	UPS	M	4.6
4.3.5	UPS	M	4.9
4.3.6	UPS	M	5.2
4.3.7	UPS	F	5.7
4.3.8	UPS	F	5.3
1.3.1	UPS	M	3.5
1.3.2	UPS	M	3.6
1.3.3	UPS	M	3.1
1.3.4	UPS	F	3.9
1.3.5	UPS	F	2.7
1.3.6	UPS	F	2
8.2.1	UPS	F	7.2
8.2.2	UPS	M	7.4
8.2.3	UPS	M	7.4
8.2.4	UPS	F	7.7
8.2.5	UPS	F	6.6
5.2.1	CTL	F	9.1
5.2.2	CTL	M	7.4
5.2.3	CTL	F	7.9
5.2.4	CTL	M	8.3
5.3.1	UPS	F	6.4
5.3.2	UPS	F	6.2
5.3.3	UPS	F	5.7
5.3.4	UPS	F	7.1
5.3.5	UPS	M	6.1
5.3.6	UPS	M	3.3
5.3.7	UPS	F	5.9
7.4.1	CTL	M	8.1
7.4.2	CTL	M	7.4
7.4.3	CTL	M	7.9
7.4.4	CTL	F	8.2
7.4.5	CTL	M	8.4
7.4.6	CTL	M	8.1
6.5.1	CTL	F	7.3
6.5.2	CTL	M	8.9
6.5.3	CTL	F	9.1
6.5.4	CTL	M	8.7
6.5.5	CTL	F	8.4
10.4.1	CTL	F	8.4
10.4.2	CTL	F	12.6
10.4.3	CTL	F	10.1
10.4.4	CTL	F	12.2
10.4.5	CTL	M	12.7

## Sheet: p26 weights
Animal	Condition	Sex	Weight (g)
P6.2.1	UPS	M	9.6
P6.2.2	UPS	F	9.8
P6.2.3	UPS	F	4.1
P6.2.4	UPS	F	10.2
P6.2.5	UPS	M	6.6
P6.2.6	UPS	F	6.2
P6.2.7	UPS	M	5.6
P1.1.1	CTL	F	13.1
P1.1.2	CTL	M	12.8
P1.1.3	CTL	F	13.3
P1.1.4	CTL	F	10.1
P1.1.5	CTL	M	12
P1.1.6	CTL	M	11.2
P2.1.1	UPS	F	11.3
P2.1.2	UPS	M	11.4
P2.1.3	UPS	F	11.8
P2.1.4	UPS	M	10.8
P2.1.5	UPS	F	10.1
P2.1.6	UPS	F	6
P2.1.7	UPS	F	10.9
P2.1.8	UPS	F	3.3
P2.3.1	UPS	M	11.3
P2.3.2	UPS	M	12.2
P2.3.3	UPS	M	11.5
P2.3.4	UPS	M	12.1
P2.3.5	UPS	M	11.7
P6.1.1	UPS	F	9.3
P6.1.2	UPS	M	8.1
P6.1.3	UPS	F	7.2
P6.1.4	UPS	F	9.4
P6.1.5	UPS	F	9.3
3.1.1	CTL	M	10.4
3.1.2	CTL	M	12.4
3.1.3	CTL	M	12.4
3.1.4	CTL	F	10.9
3.1.5	CTL	M	9.1
3.1.6	CTL	F	12.1
3.1.7	CTL	F	12.6
3.1.8	CTL	M	12
3.1.9	CTL	F	12.1
3.1.10	CTL	M	12.5
8.3.1	CTL	M	11.7
8.3.2	CTL	M	12.5
8.3.3	CTL	M	12.7
8.3.4	CTL	F	13.7
8.3.5	CTL	M	13.6
8.3.6	CTL	M	12.6
8.3.7	CTL	F	13.3
8.3.8	CTL	M	9.4
9.1.1	CTL	M	11.8
9.1.2	CTL	F	11.6
9.1.3	CTL	F	8.4
9.1.4	CTL	F	11.8
9.1.5	CTL	F	12.3
9.1.6	CTL	F	8.8
9.1.7	CTL	M	11.7
9.1.8	CTL	M	11.9
9.1.9	CTL	M	11.5
10.2.1	UPS	F	6
10.2.2	UPS	F	11.6
10.2.3	UPS	M	12.3
10.2.4	UPS	F	11.9
10.2.5	UPS	F	12.7
10.2.6	UPS	M	11.5
4.3.1	UPS	F	8.7
4.3.2	UPS	M	8.3
4.3.3	UPS	F	7.5
4.3.4	UPS	M	7.7
4.3.5	UPS	M	9
4.3.6	UPS	M	9.1
4.3.7	UPS	F	8.2
4.3.8	UPS	F	6.6
1.3.1	UPS	M	7.1
1.3.2	UPS	M	7.3
1.3.3	UPS	M	6.6
1.3.4	UPS	F	4.8
1.3.5	UPS	F	3.6
1.3.6	UPS	F	11
8.2.1	UPS	F	11.7
8.2.2	UPS	M	11.3
8.2.3	UPS	M	11.2
8.2.4	UPS	F	11.3
8.2.5	UPS	F	13.7
5.2.1	CTL	F	12.1
5.2.2	CTL	M	13
5.2.3	CTL	F	13
5.2.4	CTL	M	10.1
5.3.1	UPS	F	11.8
5.3.2	UPS	F	9
5.3.3	UPS	F	9.7
5.3.4	UPS	F	10.2
5.3.5	UPS	M	9.2
5.3.6	UPS	M	12.7
5.3.7	UPS	F	13.6
7.4.1	CTL	M	12
7.4.2	CTL	M	12
7.4.3	CTL	M	13.4
7.4.4	CTL	F	12
7.4.5	CTL	M	11.6
7.4.6	CTL	M	13.5
6.5.1	CTL	F	12.3
6.5.2	CTL	M	14.6
6.5.3	CTL	F	13.1
6.5.4	CTL	M	13.9
6.5.5	CTL	F	14.6
10.4.1	CTL	F	14.5
10.4.2	CTL	F	15.1
10.4.3	CTL	F	15.3

## Sheet: Adult Weight
		Control								UPS
	Male (g)	27	26.9	27.8	25.4	25.4	27.4	27.3	30.2	20.9	21.3	24.5	25.3	28	26.8	28.7	27
	Female (g)	21.6	21.1	18.6	22.6	20.9	20.1	22.4	20.5	19.3	17.1	20.3	19.1	18.9	15.8	21.8	18.8

## Sheet: Cort
	CTL							UPS
Males (ng/ml)	311.84	194.151	199.013	244.475	273.46	263.998	258.48	130.073	110.63	99.9465	85.692	344.123	235.672	110.799	84.8654
Females (ng/ml)	110.63	99.9465	85.692	130.073	235.672	110.799	84.8654		227.85	95.4447	177.842	102.092	240.276	154.765	204.065

## Sheet: Adrenal Size
	Control								UPS
males (% BW)	0.0192593	0.0204461	0.0151079	0.015748	0.0165354	0.0131387	0.0142857		0.0210526	0.0230047	0.0236735	0.015415	0.0189286	0.0186567	0.00905923	0.0114815
females (% BW)	0.0356481	0.0469194	0.0430108	0.0389381	0.0382775	0.0358209	0.04375	0.0482927	0.0445596	0.0467836	0.0433498	0.0397906	0.0449735	0.0620253	0.0440367	0.0239362
