# Supplementary material for: Early life stress causes sex-specific changes in adult fronto-limbic connectivity that differentially drive learning
Source: eLife. 2020 Dec 1;9:e58301. doi: 10.7554/eLife.58301 (PMC7725504; doi:10.7554/eLife.58301)
Supplement: Figure 2—source data 1. [file elife-58301-fig2-data1.xlsx]

## Sheet: OF Center
	CTL																		UPS
Male (sec)	19.4862	23.7571	21.0878	17.9513	10.3437	22.6894	26.4264	23.0898	19.8198	31.8986	14.9816	22.6894	19.2192	42.309	15.4154	14.2809	21.288	13.2799	10.4104	15.0817	25.2252	27.1271	39.2392	27.294	40.4404	24.5579	21.5549	16.2162	15.6156	22.022	11.011	23.8238	7.87454	13.4134	15.7491
Female (sec)	7.34068	24.4912	22.5559	17.4842	14.5479	29.8298	45.4121	12.8128	25.5255	22.8228	13.8138	19.7531	16.0827	26.9603					29.3627	17.6176	28.7621	32.9663	30.4972	27.8946	14.7481	20.4872	31.2312	18.8188	25.3587	23.3233	35.2352	28.8956	28.3617	39.1725	25.8258	13.4134	26.9603	13.7471	15.8158	15.2819	39.7731

## Sheet: OF Distance
	CTL																		UPS
males (cm)	3595.82	4010.52	3403.72	3724.44	4543.6	4270.83	3120.18	3598.65	4301.55	4157.67	3355.21	3953.8	4239.72	3486.32	4095.5	4425.79	3938.27	3228.95	3303.92	3475.17	3661.48	3383.79	3850.35	4004.23	5003.44	3116.21	3648.7	4412.37	3972.97	3786.67	4182.92	3501.4	3896.89	3458.31	3764.2
females (cm)	3324.03	3257.09	3836.56	3878.91	3891.49	4323.64	4037.96	3410.6	3882.89	4458.61	2912.66	4157.27	3875.08	4063.32					4366.86	3696.37	4330.53	3385.48	4642.98	3422.13	4654.6	3653.59	4525.91	4012.54	4378.83	4118.94	3689.65	4006.1	3120.57	3235.4	4146.86	3526.42	4003.99	4476.89	4654.98	5222.32	4002.08

## Sheet: EPM OA
	CTL																			UPS
males (sec)	87.2206	43.3767	36.5699	68.9356	51.1845	27.027	51.7184	63.9306	112.779	241.575	163.63	98.365	117.651	83.0831	41.041	27.4608	39.5062	34.5679	54.3877	14.9483	38.2382	100.167	34.034	83.2833	60.1935	49.5829	66.8669	33.7671	115.182	181.048	126.059	205.806	108.475	111.378	140.541	139.206	140.474
females (sec)	85.619	72.6059	110.711	69.7698	53.9873	65.2653	61.5282	49.4495	85.1518	40.04	112.579	44.9783	118.552	13.013	24.6246	50.7174				47.4474	74.708	140.641	143.677	107.774	51.318	138.405	80.981	137.671	81.1478	67.6009	124.124	97.7644	79.1458	36.7701	129.062	65.5322	90.624	121.588	180.681	69.9366	157.457	124.958

## Sheet: EPM CA
	CTL																			UPS
males (sec)	59.5929	33.2332	124.491	59.1925	137.704	129.463	93.4268	86.8869	60.9943	8.04137	20.7541	44.3443	95.5289	48.6486	124.024	159.092	164.865	190.924	124.091	239.873	92.5592	122.623	156.924	57.4908	120.821	118.952	91.8252	188.021	96.997	61.7951	51.9186	35.8025	90.8242	95.8625	97.0971	38.8388	32.2322
females (sec)	77.1772	88.4885	75.4087	106.306	65.1318	91.9586	159.459	133.4	91.7918	105.506	34.5679	179.079	75.5422	132.199	249.283	193.961				133.066	99.1658	80.2135	53.8539	66.1662	121.221	84.0841	73.8071	106.54	53.0197	129.83	115.382	97.1972	130.898	148.248	59.326	73.0063	114.948	75.2085	69.3026	79.4127	43.043	49.4494

## Sheet: Obj Exploration
	CTL																			UPS
males (sec)	9.9	3.91	2.42	11	34.83	10.89	18.17	12.82	16.6	3.21	3.04	1.6	5.23	0.57	3.34	0.31	5.28	1.61	11.78	8.52	12.8	6.72	7.3	1.59	6.32	7.3	1.73	7.22	2.64	1.59	0.51	1.43	0.98	1.22	2.26	1.18	4.52
females (sec)	6.39	12.02	8.93	9.1	3.19	9.5	24.3	30.17	28.88	21.05	19.08	18.86	11.53	28.39						7.18	8.37	13.23	9.97	8.33	7.14	6.9	9.52	7.58	10.64	11.48	9.62	4.15	3.34	15.23	5.07	18.49	15.13	8.21	21.96	14.35	12.84	19.03

## Sheet: Context
	CTL																			UPS
Males (% freezing)	73.258	63.122	3.734	24.834	31.622	54.676	23.698	22.478	20.944	10.39	7.146	2.022	8.202	31.28	17.924	38.768	4.278	21.1	4.214	7.278	38.366	3.678	6.478	37.034	19.81	14.412	34.82	38.944	9.256	5.522	7.7	4.656	13.466	4.2	1.934	6.722	6.734
Females (% freezing)	28.522	72.3	31.444	56.702	18.744	53.624	20.544	40.766	66.1	5.244	5.666	47.67								6.256	40.686	24.288	30.154	25.6	15.188	7.246	24.054	5.578	8.432	8.076	4.378	2.744	2.91	11.822	8.688	14.934	23.122	0.344	4.154	7.986	9.276	4.846

## Sheet: Cued
	CTL																			UPS
males (% freezing)	57.558	45.002	14.066	55.912	46.044	33.582	55.2	23.69	15.378	5.8	7.2	6.468	13.222	28.136	27.446	75.976	55.666	25.312	9.312	22.112	68.4	9.888	62.802	32.398	43.642	49.536	56.2	54.8	10.644	34.066	18.31	6.6	55.978	12.288	6.644	35.088	20.954
females (% freezing)	76.288	65.312	79.934	73.088	25.042	71.222	27.444	51.71	81.554	28.8	33.886	56.622								42.822	68.4	58.312	65.244	40.712	8.622	80.466	50.868	62.932	60.824	38.512	4.756	25.846	18.068	32.2	43.934	30.842	41.536	36.956	8.334	36.378	17	23.644
