# Supplementary material for: Early life stress causes sex-specific changes in adult fronto-limbic connectivity that differentially drive learning
Source: eLife. 2020 Dec 1;9:e58301. doi: 10.7554/eLife.58301 (PMC7725504; doi:10.7554/eLife.58301)
Supplement: Figure 10—source data 1. [file elife-58301-fig10-data1.xlsx]

## Sheet: Fig S11
Tag	sex	Rearing	Amy_PFC	Amy_HPC	Amy_dHPC	Amy_vHPC	vHPC_PFC
132F	Female	CTL	8.5	13853.5	4306	12497	68.5
701F	Female	CTL	19.5	15410	5175.5	13395	59.5
702F	Female	CTL	21.5	12340.5	5720	10531	30.5
703F	Female	CTL	25.5	18105.5	5746.5	15592.5	45.5
734F	Female	CTL	69	14055	6925.5	10625	73
739F	Female	CTL	9.5	15959	5872.5	13392	34
601F	Female	CTL	55.5	17157	4638	12519	75.5
628F	Female	CTL	59.5	16278	5241	11037	70.5
657F	Female	CTL	51.5	16408	5273	11135	51.5
659F	Female	CTL	47	15961.5	5291	10670.5	73.5
660F	Female	CTL	24	16701	4995	11706	54
661F	Female	CTL	33	16247	5065	11182	56.5
138F	Female	UPS	8.5	16290	5959	12872	24
139F	Female	UPS	26.5	18073.5	6082	12548.5	36
153F	Female	UPS	31.5	16829.5	5556.5	12145.5	26.5
721F	Female	UPS	10	13386.5	4270	11867.5	31
898F	Female	UPS	41	13177	6807	10091.5	33
726F	Female	UPS	10.5	17766.5	5745.5	15045	56
633F	Female	UPS	41	15728	5733.5	9994.5	53
649F	Female	UPS	31	16893.5	5921.5	10972	54
650F	Female	UPS	44.5	14922.5	6437.5	8485	59.5
691F	Female	UPS	29	15942	6951.5	8990.5	67.5
692F	Female	UPS	44	14498	6360	8138	55
694F	Female	UPS	32.5	14455	6404	8051	45.5
128M	Male	CTL	16.5	15926	5891.5	12186	46.5
135M	Male	CTL	13.5	16119.5	5454	13712	66
711M	Male	CTL	12.5	15333.5	5871.5	11491	52.5
741M	Male	CTL	24.5	17592	5648	10437	51.5
742M	Male	CTL	22.5	15682	5481	12947	37.5
127M	Male	CTL	28	15330	6118	12497	44
705M	Male	CTL	26	12127.5	4915	10401.5	29.5
629M	Male	CTL	41	15285	5547.5	9737.5	63
632M	Male	CTL	42	16879.5	5188.5	11691	33.5
655M	Male	CTL	55	14930.5	5830.5	9100	43.5
656M	Male	CTL	34.5	15482	5647	9835	58
690M	Male	CTL	33.5	16650	5726	10924	36
697M	Male	CTL	27.5	15447	6072	9375	32
142M	Male	UPS	45	18057.5	6086.5	15116.5	109
156M	Male	UPS	43	19406.5	6096.5	17299	20.5
998M	Male	UPS	19	18342.5	6269	15532.5	97
999M	Male	UPS	26.5	16722	6124.5	13711	38.5
155M	Male	UPS	44	18104.5	5848.5	13252.5	50
728M	Male	UPS	40.5	16215	5851.5	9690.5	63
156M_dup	Male	UPS	19.5	14933.5	5629.5	12263.5	92.5
637M	Male	UPS	64	17698	5432	12266	91
644M	Male	UPS	68	16868	5875.5	10992.5	61.5
666M	Male	UPS	84.5	16914	5590.5	11323.5	68.5
667M	Male	UPS	67	17234.5	4885	12349.5	68.5
684M	Male	UPS	52.5	19296.5	6446.5	12850	98.5
687M	Male	UPS	80	17251	5491.5	11759.5	78
