# Supplementary material for: Early life stress causes sex-specific changes in adult fronto-limbic connectivity that differentially drive learning
Source: eLife. 2020 Dec 1;9:e58301. doi: 10.7554/eLife.58301 (PMC7725504; doi:10.7554/eLife.58301)
Supplement: Figure 11—source data 1. [file elife-58301-fig11-data1.xlsx]

## Sheet: Figs S12_S13
			Global connectivity		Regional amygdala connectivity
Tag	Sex	Rearing	Geff	SW	Neff	Dcent	NCp
629M	Male	CTL	0.530627	1.52013	0.818475	8.51089	0.646102
632M	Male	CTL	0.611589	1.54289	0.827739	12.6448	0.748797
655M	Male	CTL	0.644263	1.53298	0.825259	8.49303	0.651371
656M	Male	CTL	0.632148	1.49902	0.827739	8.48888	0.681271
690M	Male	CTL	0.620162	1.52675	0.825259	8.61752	0.741297
697M	Male	CTL	0.641162	1.54272	0.8351	8.49303	0.711271
128M	Male	CTL	0.55216	1.554	0.78321	8.48413	0.70178
135M	Male	CTL	0.58721	1.51356	0.83749	12.3456	0.72435
706M	Male	CTL	0.61678	1.5212	0.80476	8.51349	0.71167
711M	Male	CTL	0.69671	1.53865	0.81354	8.5322	0.61987
741M	Male	CTL	0.65134	1.50745	0.825259	8.55653	0.68256
742M	Male	CTL	0.62116	1.53623	0.79443	8.50421	0.675431
637M	Male	UPS	0.565242	1.61836	0.654684	8.46058	0.53557
644M	Male	UPS	0.559302	1.5216	0.630669	8.56741	0.622409
666M	Male	UPS	0.568328	1.6105	0.71408	8.52877	0.630303
667M	Male	UPS	0.548328	1.61132	0.681127	8.42877	0.622409
684M	Male	UPS	0.511227	1.67162	0.672417	8.11877	0.530303
687M	Male	UPS	0.531721	1.68215	0.721124	8.48987	0.610104
142M	Male	UPS	0.58142	1.65467	0.71096	8.44329	0.51342
156M	Male	UPS	0.52317	1.6043	0.68641	8.55435	0.58165
998M	Male	UPS	0.5419	1.58763	0.65709	8.55122	0.60115
999M	Male	UPS	0.56329	1.6127	0.74132	8.58431	0.58121
155M	Male	UPS	0.54736	1.6012	0.72118	8.54211	0.60278
728M	Male	UPS	0.52311	1.58231	0.67614	8.55951	0.55109
156M_dup	Male	UPS	0.52554	1.61333	0.70189	8.5612	0.58041
601F	Female	CTL	0.553093	1.53762	0.780654	12.6448	0.733425
628F	Female	CTL	0.553269	1.54688	0.825806	8.53034	0.715661
657F	Female	CTL	0.642128	1.49138	0.770996	8.49303	0.62931
659F	Female	CTL	0.691468	1.48629	0.760534	8.48888	0.66912
660F	Female	CTL	0.595424	1.52224	0.814936	8.41752	0.627544
661F	Female	CTL	0.666735	1.49113	0.802688	8.49303	0.685897
132F	Female	CTL	0.52221	1.48213	0.75133	8.48121	0.63211
701F	Female	CTL	0.63151	1.56776	0.76698	8.53651	0.65168
702F	Female	CTL	0.54512	1.50127	0.72564	12.5512	0.58121
703F	Female	CTL	0.56878	1.51431	0.79532	8.51028	0.6467
734F	Female	CTL	0.60261	1.50812	0.82311	8.55611	0.60217
739F	Female	CTL	0.66161	1.51365	0.78989	8.58109	0.61109
649F	Female	UPS	0.613225	1.54396	0.771145	8.64475	0.619055
650F	Female	UPS	0.62891	1.52184	0.743109	8.53034	0.625897
691F	Female	UPS	0.615709	1.55366	0.754124	8.49303	0.637412
692F	Female	UPS	0.593851	1.55007	0.790488	8.43692	0.622737
693F	Female	UPS	0.574386	1.59033	0.777807	12.4175	0.631656
694F	Female	UPS	0.56966	1.55134	0.725704	8.49303	0.618666
138F	Female	UPS	0.55348	1.5021	0.82412	8.49031	0.59176
139F	Female	UPS	0.55501	1.51231	0.75665	8.51212	0.63241
153F	Female	UPS	0.54219	1.55766	0.76651	8.45501	0.65341
721F	Female	UPS	0.57345	1.54211	0.71301	12.2135	0.62227
898F	Female	UPS	0.5632	1.49765	0.70678	8.14514	0.58141
726F	Female	UPS	0.53101	1.49015	0.72818	8.2389	0.55214
